# Supplementary material
Source: publisher figshare collection journal article supplement (https://acs.figshare.com/ndownloader/files/17618351)
Supplement: Supplementary file 1 [file 17618351]

Supporting information for

## **Vertically Stacked CVD-Grown 2D Heterostructure for Wafer-Scale Electronics**

Seongchan Kim,<sup>1</sup> Young Chan Kim,<sup>1</sup> Young Jin Choi,<sup>1</sup> Hwi Je Woo,<sup>1</sup> Young Jae Song,<sup>1,2</sup> Moon Sung Kang,<sup>4</sup> Changgu Lee,<sup>1,3</sup> Jeong Ho Cho<sup>5,\*</sup>

<sup>1</sup>SKKU Advanced Institute of Nanotechnology (SAINT), <sup>2</sup>Department of Physics, <sup>3</sup>School of Mechanical Engineering, Sungkyunkwan University, Suwon, 440–746, Korea.

<sup>4</sup> Department of Chemical and Biomolecular Engineering, Sogang University, Seoul 04107, Korea.

<sup>5</sup>Department of Chemical and Biomolecular Engineering, Yonsei University, Seoul 03722, Korea.

\*Corresponding author: J.H.Cho ([jhcho94@yonsei.ac.kr](mailto:jhcho94@yonsei.ac.kr))

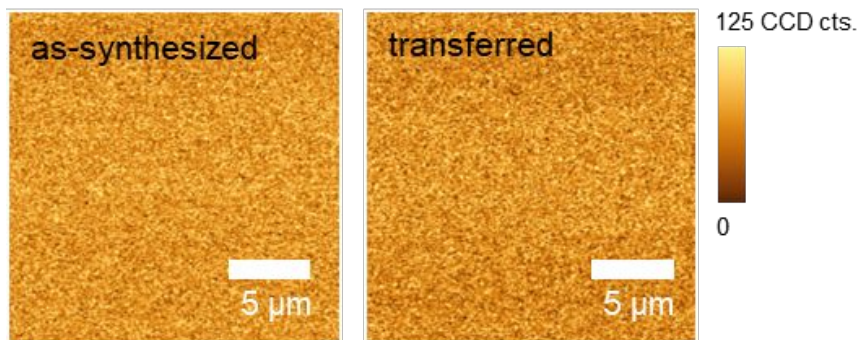

**Figure S1.** Raman mapping images of as-synthesized and transferred bulk MoS<sub>2</sub> by E<sub>12g</sub> mode frequency.

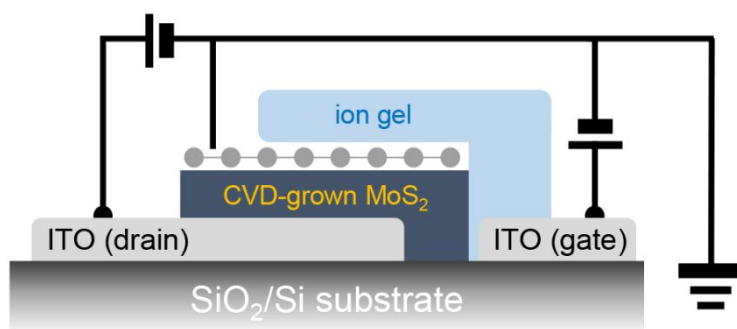

**Figure S2.** Cross-sectional schematic structure of the vertical transistor.

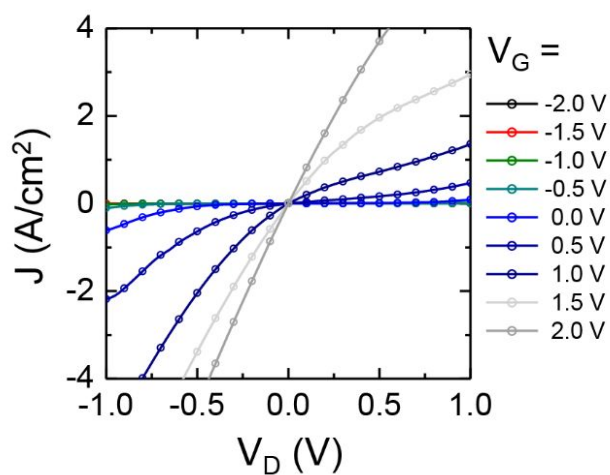

**Figure S3.** Linear plot of output characteristics of the vertical transistors at different  $V_{GS}$ .

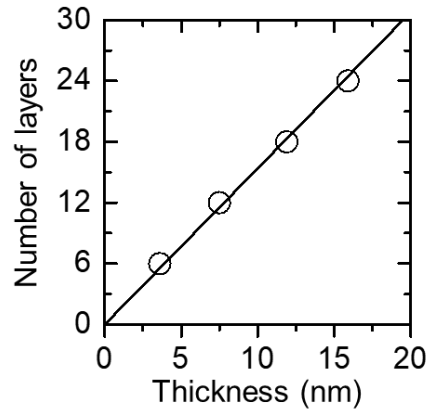

**Figure S4.** Number of MoS<sub>2</sub> layer as a function of the thickness.

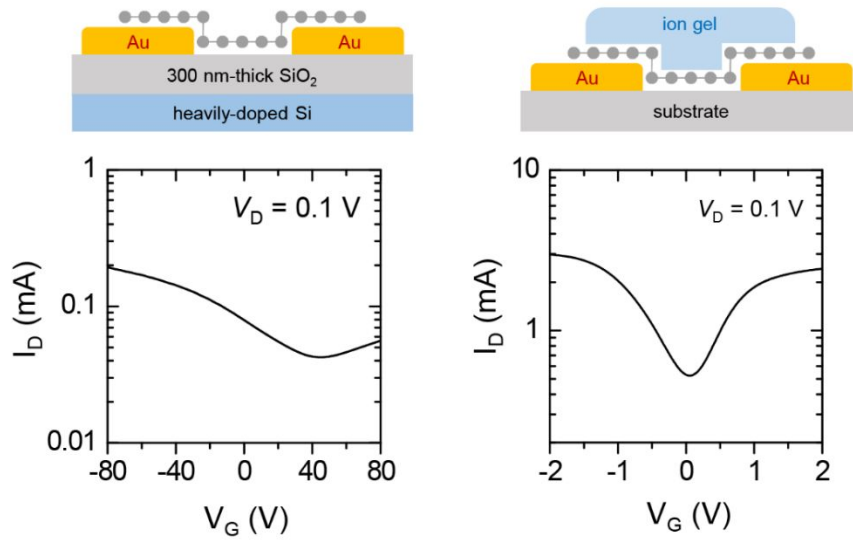

**Figure S5.** Transfer characteristics of the graphene transistors with the SiO<sub>2</sub> back gate dielectrics and the ion gel top-gate dielectrics.

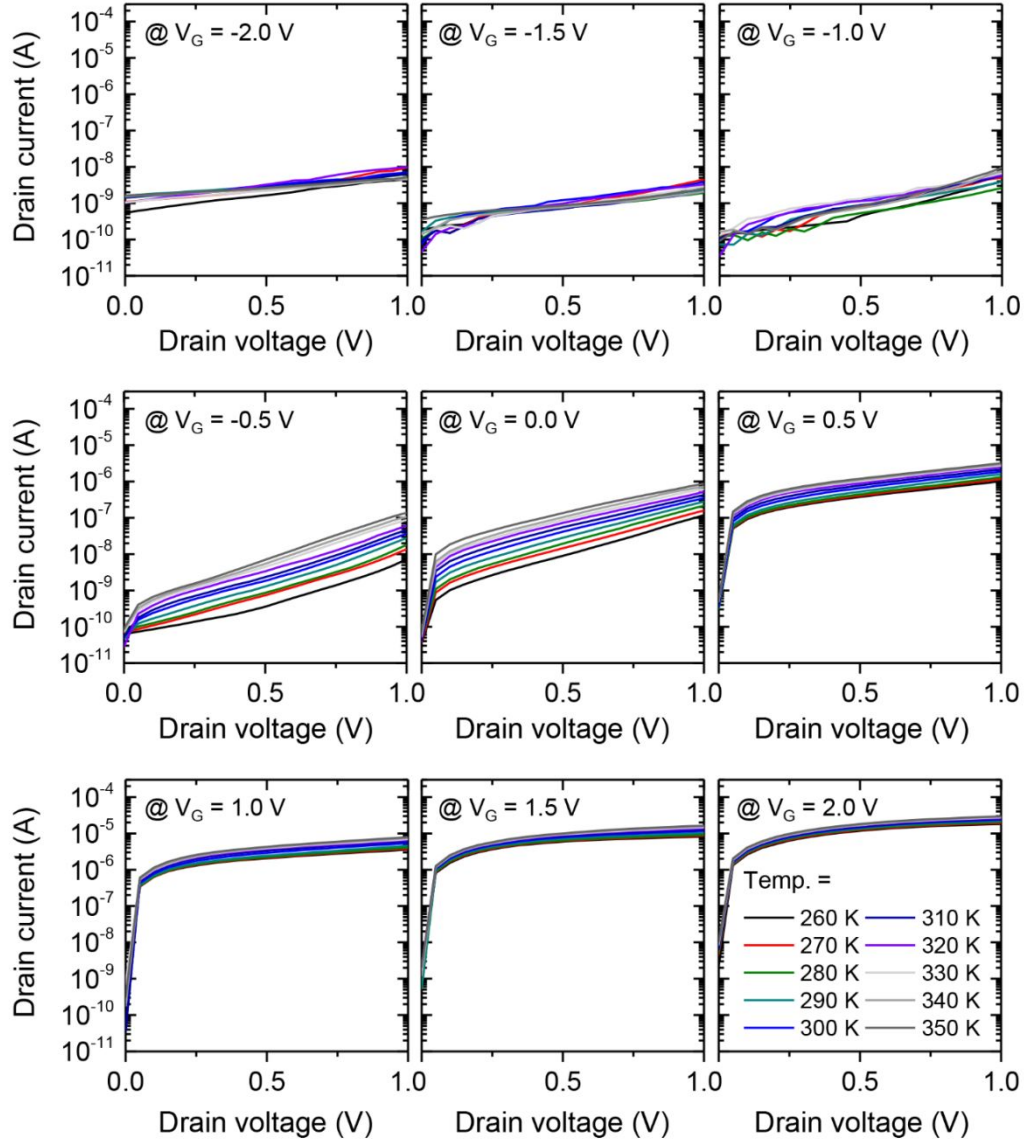

**Figure S6.** Output characteristics of the vertical transistors measured under various temperatures and  $V_{GS}$ .

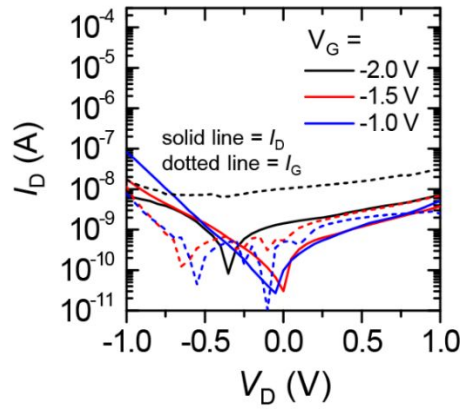

**Figure S7.**  $I_D$  and  $I_G$  as a function of  $V_D$  of the vertical transistors at  $V_G = -1.0, -1.5$ , and  $-2.0$  V.
